# Supplementary material
Source: publisher site journal article supplement (http://kjim.org/upload/media/kjim-2023-193-Supplementary-Table-1.pdf)
Supplement: Supplementary file 1 [file kjim-2023-193-Supplementary-Table-1.pdf]

**Supplementary Table 1. Laboratory findings at the time of RA and suspected NTM-PD**

| Variable                          | At RA diagnosis   | At suspected NTM  | <i>p</i> value |
|-----------------------------------|-------------------|-------------------|----------------|
| ESR, mm/h                         | 46.0 ± 30.2       | 37.6 ± 30.6       | 0.014          |
| CRP, mg/dL                        | 2.37 ± 3.46       | 3.04 ± 5.64       | 0.329          |
| DAS28                             | 5.0 ± 1.6         | 3.7 ± 1.3         | < 0.001        |
| WBC, / $\mu$ L                    | 8,090.6 ± 2,860.9 | 7,447.6 ± 2,894.1 | 0.110          |
| Neutrophil, / $\mu$ L             | 5,524.8 ± 2,537.9 | 5,199.7 ± 3,082.6 | 0.420          |
| Lymphocyte, / $\mu$ L             | 1,905.3 ± 745.5   | 1,547.8 ± 674.9   | < 0.001        |
| Hb, mg/dL                         | 13.5 ± 12.3       | 12.2 ± 1.8        | 0.335          |
| Hct, %                            | 36.7 ± 4.0        | 36.7 ± 5.2        | 0.936          |
| Platelet, $\times 10^3$ / $\mu$ L | 298.3 ± 108.9     | 266.5 ± 95.0      | 0.004          |
| Total protein, g/dL               | 7.2 ± 0.8         | 7.0 ± 0.8         | 0.003          |
| Albumin, g/dL                     | 4.1 ± 0.4         | 4.1 ± 0.6         | 0.361          |

CRP, C-reactive protein; DAS, disease activity score; ESR, erythrocyte sedimentation rate; Hb, hemoglobin; Hct, hematocrit; NTM-PD, non-tuberculous mycobacterial pulmonary disease; RA, rheumatoid arthritis; WBC, white blood cell.  
*p* values are calculated using chi-square test or Student's t-test.
